# Supplementary material for: The molecular basis for SARS-CoV-2 recognized by dog ACE2
Source: Research Square preprint supplement (doi:10.21203/rs.3.rs-263301/v1), 2021-03-02
Supplement: Supplementary file 1 [file 22c2b8c2587f209800e193b6.docx]

| **SARS-CoV-2 RBD** | **dACE2** | **hACE2** |
| --- | --- | --- |
| R403 (1/0) | Y33(1) | - |
| K417 (2,1/3,1) | E29 (1,1) | D30 (3,2) |
| G446 (1,1/1,1) | Q41 (0,1) | Q42 (1) |
| Y449 (6,2/8,2) | E37 (4,1), Q41 (0,1) | D38 (5,1), Q42 (1,1) |
| Y453 (6/3) | Y33 (6) | H34 (3) |
| L455 (3/4) | E29(1), Y33 (2) | H34 (4) |
| F456 (4/7) | T26 (3), E29 (1) | T27 (5), D30 (1), K31 (1) |
| A475 (3/5,1) | L23(2), T26(1) | S19 (3,1), Q24 (1), T27 (1) |
| G476 (0/2) |  | S19 (2) |
| F486 (10/11) | T81(3), T82 (7) | M82 (4), Y83 (7) |
| N487 (4,1/11,2) | L23 (1), Y82 (3,1) | Q24 (7,1), Y83 (4,1) |
| Y489 (7/7,1) | T26 (1), F27 (3), K30 (2),  Y82 (1) | T27 (2), F28 (4), Y83 (0,1) |
| F490 (0/1) |  | K31 (0,1) |
| Q493 (0/8,1) |  | H34 (3), E35 (4,1) |
| G496 (6,1/2,1) | E37 (2), K352 (4,1) | D38 (1), K353 (1,1) |
| Q498 (10,2/19,1) | E37 (2,1), Y40(3), Q41 (2, 1), K352(3,1) | D38(1), Y41(7), Q42(9,1), L45(2) |
| T500 (17,2/17,1) | Y40 (6,1), N329(4), D354 (6,1), R356 (1) | Y41 (5,1), N330 (3),  D355 (5), R357 (3) |
| N501 (11,1/10,2) | Y40 (5,1), E325(1), K352(5) | Y41 (5,1), K353 (4,1) |
| G502 (7,1/8,1) | K352 (2,1), G353(5) | K353 (3,1), G354 (5) |
| Y505 (27,2/20,1) | E36(7,1), K352 (18), R392(1,1) | E37 (2,1), K353 (15),  G354 (2), R392(1) |
| Q506(1,1/0) | E325(1,1) |  |
| Total | 127, 13 | 145, 16 |

**Table S2 Comparison of residue contacts of SARS-CoV-2 RBD binding to dACE2 and hACE2**

The numbers in parentheses of SARS-CoV-2 RBD residues represent the number of vdw and H-bond/salt bridges contacts between the indicated residue with dACE2 (the former) and hACE2 (the latter). The numbers in parentheses of ACE2 residues represent the numbers of vdw contacts the indicated residues conferred. The numbers with underlines suggest numbers of potential H-bonds or salt bridges between the pairs of residues. Vdw contacts were analyzed at a cutoff of 4 Å. H-bonds/salt bridges were analysis with PDBePISA (https://www.ebi.ac.uk/pdbe/pisa/)
