# Supplementary material for: The molecular basis for SARS-CoV-2 recognized by dog ACE2
Source: Research Square preprint supplement (doi:10.21203/rs.3.rs-263301/v1), 2021-03-02
Supplement: Supplementary file 2 [file 7ac8bd67bf17f4972997ab24.docx]

Table S1. Data collection and refinement statistics

|  | **SARS2-CoV-2 RBD/dACE2** | |
| --- | --- | --- |
| **Data collection** |  | |
| Space group | I422 | |
| Cell dimensions |  | |
| *a*, *b*, *c* (Å) | 168.26, 168.26, 211.20 | |
| α, β, γ (o) | 90.00, 90.00, 90.00 | |
| Resolution (Å) | 50.00-3.00 (3.11-3.00) | |
| Unique reflections  Completeness (%) | 30355 (2989)  98.5 (99.5) | |
| *R*merge  *I* /σ*I* | 0.18.4 (0.599)  8.8 (2.6) | |
| CC1/2 (%) | 0.980 (0.819) |
| Redundancy | 6.3 (6.2) | |
|  |  | |
| **Refinement** |  | |
| Resolution (Å) | 48.26-3.00 | |
| No. reflections | 29668 | |
| *R*work / *R*free | 0.2272/0.2479 | |
| No. atoms |  | |
| Protein | 7244 | |
| Ligand/ion | 1 | |
| Water | 0 | |
| *B*-factors |  | |
| Protein | 52.6 | |
| Ligand/ion | 76.8 | |
| Water |  | |
| R.M.S. deviations |  | |
| Bond lengths (Å) | 0.002 | |
| Bond angles (o) | 0.531 | |
| Ramchandran  Statistics (%)  Favored  Allowed  Disallowed | 96.49  3.51  0.00 | |

Values in parentheses are for the highest resolution shell.
