# Supplementary material for: The molecular basis for SARS-CoV-2 recognized by dog ACE2
Source: Research Square preprint supplement (doi:10.21203/rs.3.rs-263301/v1), 2021-03-02
Supplement: Supplementary file 3 [file 835a1349bb3656ff7bb7ecc7.docx]

Table S3 Hydrogen bonds and salt bridges at the binding interfaces of in the dACE2/SARS-CoV-2 RBD and the hACE2/ SARS-CoV-2 RBD complexes (*)

|  |  | dACE2/SARS-CoV-2 RBD complex | | | | |  |  | hACE2/ SARS-CoV-2 RBD complex | | | | |
| --- | --- | --- | --- | --- | --- | --- | --- | --- | --- | --- | --- | --- | --- |
| Chain B | | Distance | Chain A | |  |  |  | Distance |  |  |
| Hydrogen bond | No. | Residue | Atom | Residue | Atom |  | No. | Residue | Atom | Residue | Atom |
| 1 | K417 | NZ | 3.25 | E29 | OE1 |  | 1 | K417 | NZ | 2.86 | D30 | OD1 |
| 2 | Y449 | OH | 2.66 | E37 | OE2 |  | 2 | Y449 | OH | 3.09 | Q42 | OE1 |
| 3 | N487 | ND2 | 3.16 | Y82 | OH |  | 3 | Y449 | OH | 2.83 | D38 | OD1 |
| 4 | Q498 | NE2 | 2.92 | E37 | OE2 |  | 4 | N487 | ND2 | 2.82 | Y83 | OH |
| 5 | T500 | OG1 | 2.43 | Y40 | OH |  | 5 | Y489 | OH | 3.54 | Y83 | OH |
| 6 | N501 | N | 3.73 | Y40 | OH |  | 6 | Q493 | NE2 | 3.39 | E35 | OE1 |
| 7 | G502 | N | 2.92 | K352 | O |  | 7 | Q498 | NE2 | 2.57 | Q42 | OE1 |
| 8 | Y505 | OH | 2.52 | E36 | OE2 |  | 8 | T500 | OG1 | 2.73 | Y41 | OH |
| 9 | Q506 | NE2 | 3.59 | E325 | OE2 |  | 9 | N501 | N | 3.62 | Y41 | OH |
| 10 | G446 | O | 3.61 | Q41 | NE2 |  | 10 | G502 | N | 2.79 | K353 | O |
| 11 | Y449 | OH | 3.36 | Q41 | NE2 |  | 11 | Y505 | OH | 3.66 | E37 | OE1 |
| 12 | G496 | O | 2.97 | K352 | NZ |  | 12 | A475 | O | 2.81 | S19 | OG |
| 13 | Y505 | OH | 3.6 | R392 | NH2 |  | 13 | N487 | OD1 | 2.87 | Q24 | NE2 |
|  |  |  |  |  |  |  | 14 | F490 | O | 3.82 | K31 | NZ |
|  |  |  |  |  |  |  | 15 | G496 | O | 3.22 | K353 | NZ |
| Salt bridge | 1 | K417 | NZ | 3.25 | E29 | OE1 |  | 1 | K417 | NZ | 3.76 | D30 | OD2 |
|  |  |  |  |  |  |  | 2 | K417 | NZ | 2.86 | D30 | OD1 |

(*) H-bonds/salt bridges were analysis with PDBePISA (https://www.ebi.ac.uk/pdbe/pisa/)
